# Supplementary material for: Evaluation of Mono- and Bi-Functional GLOBE-Based Vectors for Therapy of β-Thalassemia by HBBAS3 Gene Addition and Mutation-Specific RNA Interference
Source: MDPI journal article supplement (doi:10.3390/cells12242848), 2023-12-15
Supplement: s1 [file s1]

# Evaluation of Mono- and Bi-Functional GLOBE-Based Vectors for the Therapy of $\beta$ -Thalassemia via $HBB^{AS3}$ Gene Addition and Mutation-Specific RNA Interference

Lola Koniali <sup>1</sup>, Christina Flouri <sup>2,†</sup>, Markela I. Kostopoulou <sup>1</sup>, Nikolettta Y. Papaioannou <sup>1</sup>, Panayiota L. Papasavva <sup>1</sup>, Basma Naiisseh <sup>1</sup>, Coralea Stephanou <sup>1</sup>, Anthi Demetriadou <sup>1</sup>, Maria Sitarou <sup>3</sup>, Soteroula Christou <sup>4</sup>, Michael N. Antoniou <sup>2</sup>, Marina Kleanthous <sup>1</sup>, Petros Patsali <sup>1,\*</sup> and Carsten W. Lederer <sup>1,\*</sup>

- <sup>1</sup> Department of Molecular Genetics Thalassemia, The Cyprus Institute of Neurology & Genetics, 6 Iroon Avenue, 2371 Nicosia, Cyprus; lkoniali@hotmail.com (L.K.); markella.kostopoulou@hotmail.com (M.I.K.); nikolettat@cing.ac.cy (N.Y.P.); panayiotat@cing.ac.cy (P.L.P.); basman@cing.ac.cy (B.N.); coraleas@cing.ac.cy (C.S.); anthide@cing.ac.cy (A.D.); marinakl@cing.ac.cy (M.K.)
- <sup>2</sup> Gene Expression and Therapy Group, Department of Medical and Molecular Genetics, King's College London, Guy's Hospital, London SE1 9RT, UK; christina.flouri@gmail.com (C.F.); michael.antoniou@kcl.ac.uk (M.N.A.)
- <sup>3</sup> Thalassemia Clinic Larnaca, Larnaca General Hospital, 6301 Larnaca, Cyprus; msitarou@yahoo.gr
- <sup>4</sup> Thalassemia Clinic Nicosia, Archbishop Makarios III Hospital, 1474 Nicosia, Cyprus; snchrthalcl@cytanet.com.cy
- \* Correspondence: petrospa@cing.ac.cy (P.P.); lederer@cing.ac.cy (C.W.L.); Tel.: +357-22-392652 (C.W.L.); Tel.: +357-22-392764 (P.P.)
- † Current address: Medicines Research Center, GSK, Stevenage SG1 2NY, UK.

**Citation:** Koniali, L.; Flouri, C.; Kostopoulou, M.I.; Papaioannou, N.Y.; Papasavva, P.L.; Naiisseh, B.; Stephanou, C.; Demetriadou, A.; Sitarou, M.; Christou, S.; et al. Evaluation of Mono- and Bi-Functional GLOBE-Based Vectors for the Therapy of  $\beta$ -Thalassemia via  $HBB^{AS3}$  Gene Addition and Mutation-Specific RNA Interference. *Cells* **2023**, *12*, 2848. <https://doi.org/10.3390/cells12242848>

Academic Editors: Albert Rizvanov and Aysegül Doğan

Received: 15 October 2023

Revised: 10 December 2023

Accepted: 11 December 2023

Published: 15 December 2023

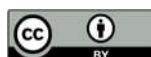

**Copyright:** © 2023 by the authors. Licensee MDPI, Basel, Switzerland. This article is an open access article distributed under the terms and conditions of the Creative Commons Attribution (CC BY) license (<https://creativecommons.org/licenses/by/4.0/>).

## 1. Supplementary Figures

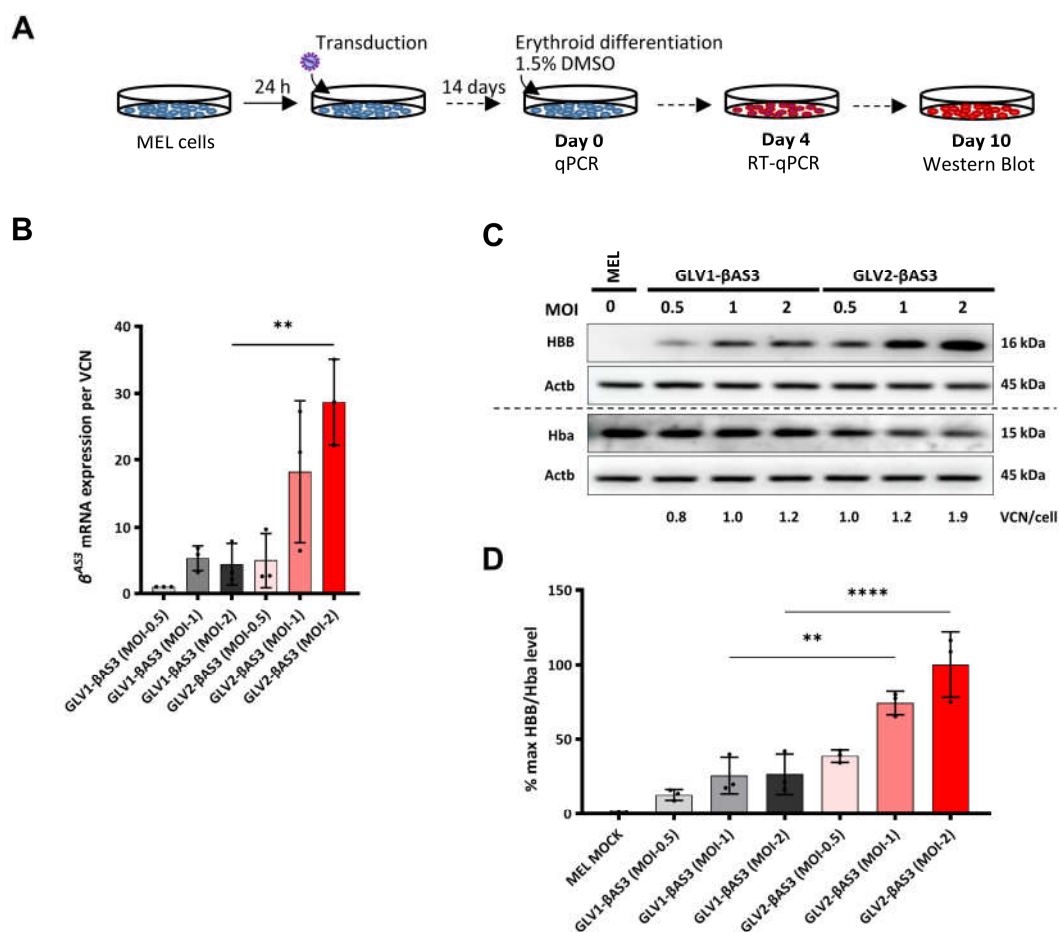

**Figure S1. Functional analysis of the GLOBE-based  $HBB^{\beta AS3}$  transgene-expressing lentiviral vectors in MEL cells.** (A) MEL cell transduction with GLV1- $\beta AS3$  and GLV2- $\beta AS3$  at increasing MOI (0.5, 1, 2) and erythroid differentiation for 10 days to assess vector-derived  $\beta^{\beta AS3}$ -transgene expression levels. (B) Relative  $HBB^{\beta AS3}$  ( $\beta^{\beta AS3}$ ) mRNA expression measured by RT-qPCR on day 4 of erythroid differentiation (n=3). (C) Immunoblots of HBB, Hba protein and  $\beta$ -actin—used as loading control in terminally differentiated (day 10) mock- and LV-transduced MEL cell pools (n=3), based on equivalent detection of HBB and  $HBB^{\beta AS3}$  by anti-HBB antibody. The dashed line indicates detection on separate membranes. (D) Percentage of differentiation-normalized HBB chain levels relative to the highest value for each experiment, as determined via densitometry analysis using Image J. Messenger RNA and protein levels were normalized to endogenous Hba expression and corrected for VCN. Statistical significance was calculated using one-way ANOVA, \*  $p < 0.05$  \*\*  $p < 0.01$  \*\*\*  $p < 0.001$  and \*\*\*\*  $p < 0.0001$ .

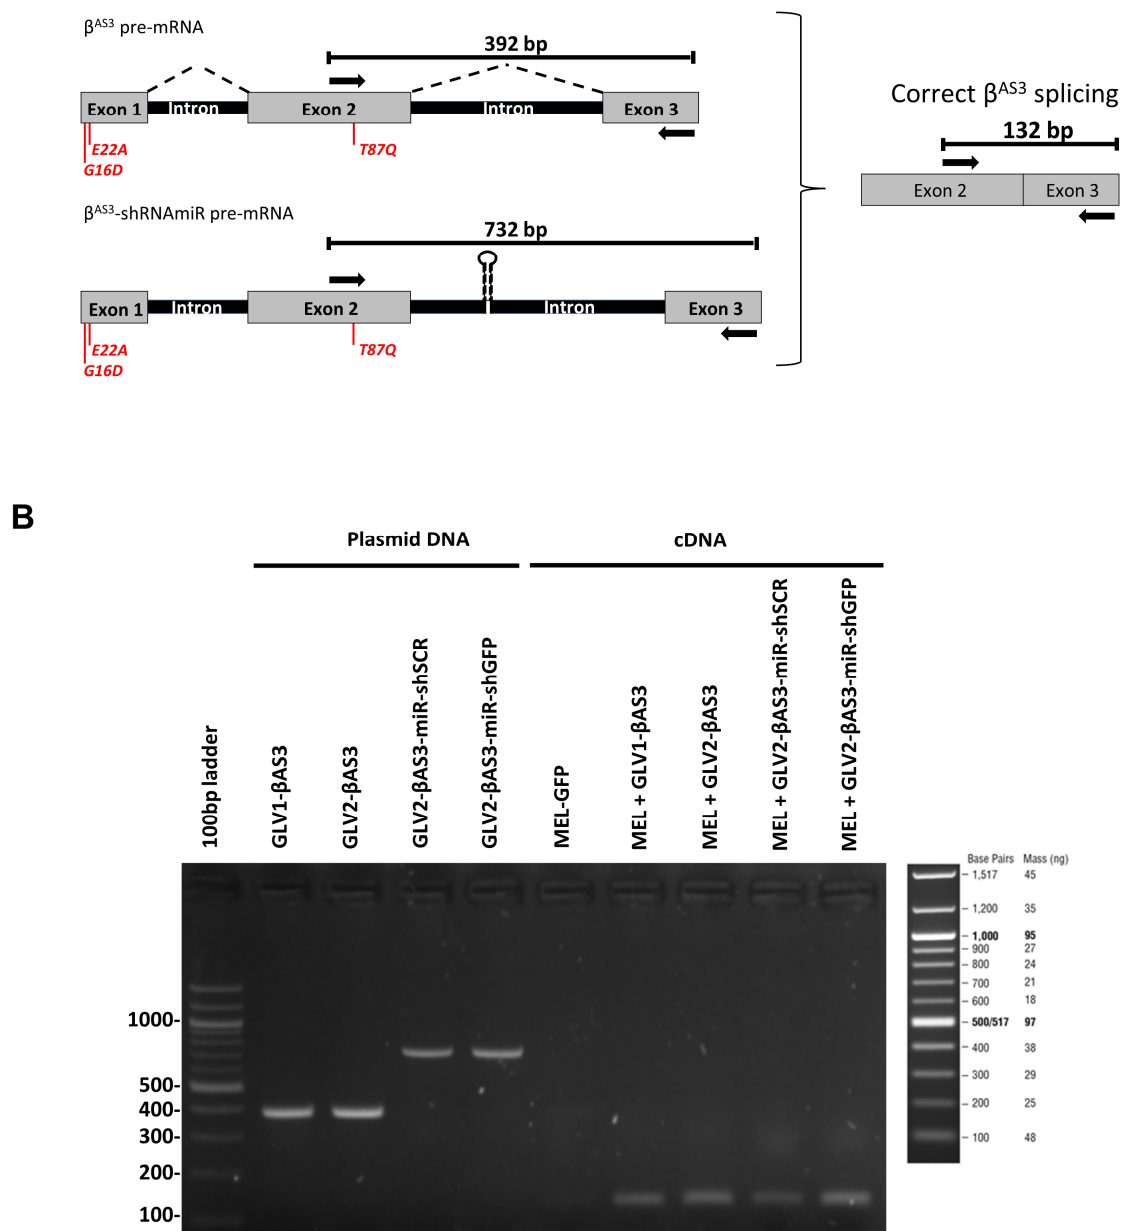

**Figure S2.** Splicing of the anti-sickling human *HBB*<sup>AS3</sup> transgene bearing the miR30-shRNA expression cassette. **(A)** Schematic of *HBB*<sup>AS3</sup> ( $\beta^{AS3}$ ) transgene (exon 1 and exon 2 are represented as grey boxes, and intron 1 and 2 as black lines) bearing the three anti-sickling mutations (indicated in red) with the intron-encoded miR30-expression cassette ( $\beta$ AS3-miR30-shRNA pre-mRNA). Binding regions of PCR primers specific for  $\beta^{AS3}$  fragment detection are shown with black arrows. **(B)** PCR products were separated by gel electrophoresis on a 2% agarose gel.

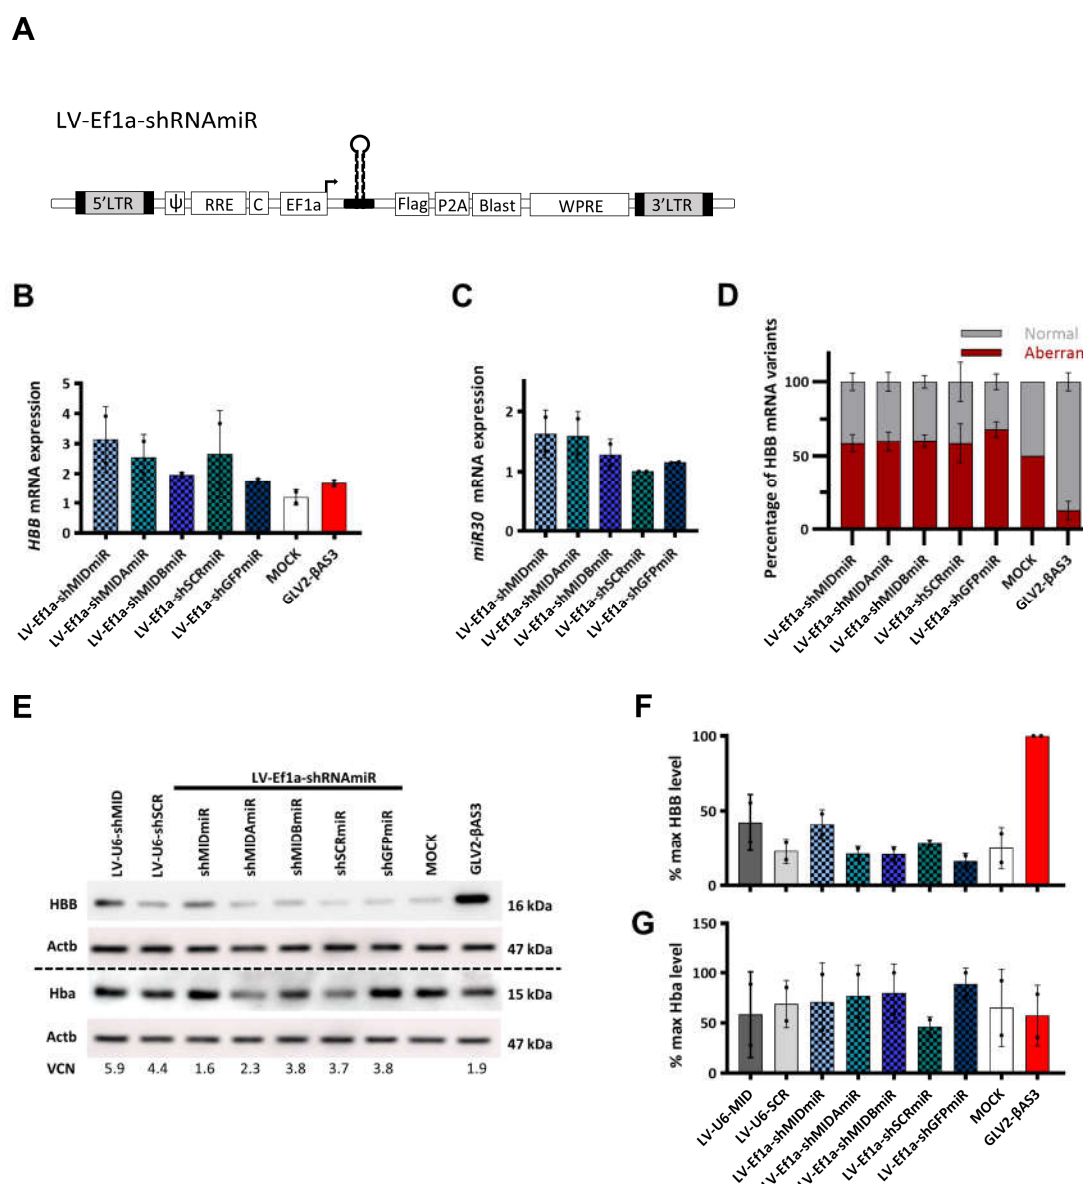

**Figure S3. Design and functional evaluation of shRNAmiR guide strand variants targeting the aberrant  $HBB^{IVS-110(G>A)}$  mRNA using the *Ef1a*-promoter-driven LV (LV-Ef1a-shRNAmiR). (A)** Schematic representation of lentiCas9-Blast (Addgene: 52962) modified to express the miR30-based shRNA expression cassette in place of Cas9.  $\psi$ , Psi packaging signal; RRE, Rev response element; C, central polypurine tract; EF1a, elongation factor 1a short promoter; Flag, Flag octapeptide tag; P2A, 2A self-cleaving peptide; WPRE, Woodchuck Hepatitis Virus post-transcriptional regulatory element; Blast, blasticidin selection marker; 5'/3'LTR, 5' and 3' LV long terminal repeats. **(B)** Relative *HBB* mRNA expression and **(C)** vector-derived miR30 mRNA expression measured by RT-qPCR on day 4 of erythroid differentiation of MEL-*HBB*<sup>IVS</sup> cells. Target mRNA levels were normalized against *Hba* mRNA and expressed per vector copy. Data represent mean $\pm$ SD of three independent experiments from a single LV preparation. **(D)** Percentage contribution of aberrant and normal *HBB* mRNA in bulk MEL-*HBB*<sup>IVS</sup> cells (n=3). **(E)** Representative images of immunoblots for HBB, Hba protein levels and  $\beta$ -actin (used as loading control) in transduced MEL-*HBB*<sup>IVS</sup> cells on day 10 of erythroid differentiation, based on equivalent detection of HBB and *HBB*<sup>AS3</sup> by anti-HBB antibody. The dashed line indicates detection on separate membranes. **(F)** Percentage of differentiation-normalized HBB levels (normalized to VCN) and **(G)**  $\beta$ -actin-normalized Hba levels relative to the highest value for each experiment as determined by densitometry analysis of immunoblots from two independent transduction experiments.

## 2. Supplementary Tables

Table S1. Oligonucleotides used for the generation of miR30<sup>shRNA</sup>-based vectors

| Oligonucleotides                                                                                                         | Sequence (5'-3') <sup>1</sup>                                                                                                                                                                                                                                                                                                                                                                                                                                                                                                                                                                                                                                                                                                                                                                                                                                                                                                                                                                                                                                                                                                                                                                                                                                                                                                                                                                                                |
|--------------------------------------------------------------------------------------------------------------------------|------------------------------------------------------------------------------------------------------------------------------------------------------------------------------------------------------------------------------------------------------------------------------------------------------------------------------------------------------------------------------------------------------------------------------------------------------------------------------------------------------------------------------------------------------------------------------------------------------------------------------------------------------------------------------------------------------------------------------------------------------------------------------------------------------------------------------------------------------------------------------------------------------------------------------------------------------------------------------------------------------------------------------------------------------------------------------------------------------------------------------------------------------------------------------------------------------------------------------------------------------------------------------------------------------------------------------------------------------------------------------------------------------------------------------|
| miR30 <sup>shMID</sup>                                                                                                   | <u>cgtctcaagcgagctctat</u> tttccacccttaggtagtgaagccacagatgtacctaaggggtgggaaaatagacctgcctgagacg                                                                                                                                                                                                                                                                                                                                                                                                                                                                                                                                                                                                                                                                                                                                                                                                                                                                                                                                                                                                                                                                                                                                                                                                                                                                                                                               |
| miR30 <sup>shMIDA</sup>                                                                                                  | <u>cgtctcaagcgagcgctctat</u> tttccacccttaggtagtgaagccacagatgtaggggtgggaaaatagacgcgcctgcctgagacg                                                                                                                                                                                                                                                                                                                                                                                                                                                                                                                                                                                                                                                                                                                                                                                                                                                                                                                                                                                                                                                                                                                                                                                                                                                                                                                              |
| miR30 <sup>shMIDB</sup>                                                                                                  | <u>cgtctcaagcgagcgcat</u> tttccacccttaggtagtgaagccacagatgtacctaaggggtgggaaaatgcgcctgcctgagacg                                                                                                                                                                                                                                                                                                                                                                                                                                                                                                                                                                                                                                                                                                                                                                                                                                                                                                                                                                                                                                                                                                                                                                                                                                                                                                                                |
| miR30 <sup>shSCR</sup>                                                                                                   | <u>cgtctcaagcgacctaagg</u> gttaagtcgcctcgtcttagtgaagccacagatgtagagcgagggcgacttaaccttaggtgcctgagacg                                                                                                                                                                                                                                                                                                                                                                                                                                                                                                                                                                                                                                                                                                                                                                                                                                                                                                                                                                                                                                                                                                                                                                                                                                                                                                                           |
| miR30 <sup>shGFP</sup>                                                                                                   | <u>cgtctcaagcgagcacaag</u> ctggagtacaactatagtgaagccacagatgtatagttgtactccagcttgctgcctgcctgagacg                                                                                                                                                                                                                                                                                                                                                                                                                                                                                                                                                                                                                                                                                                                                                                                                                                                                                                                                                                                                                                                                                                                                                                                                                                                                                                                               |
| β-Term sequence                                                                                                          | gcatagtgttaccatcaaccacctaactcatttttctattcaatacctaggtaggtagatgctagattctggaataaaatagagtctcaagtgg<br>tcctgtctctctccagtc aaattctgaatctagtgttgcaagattctgaaatcaaggcatataatcagtaataagtgtatagaaagggtatatag<br>aagaattttattatagagagggtgaaacctcaaaatgaaatgaaatcagacctgtctctacaccataaacaataaattgaatgggttaa<br>agaattaaactaagacctaataaccataaaaaatttttaagaaatcaaaagaagaaaattctaattcatgttgagccgtttttgaatttgatag<br>agaagcaaaggcaaaaaaggaaaaataaagaagtgaggctacatcaaaactaaaaaatttcacacaaaaaagaaaacaatgaacaaatga<br>aaggtgaacctgaaatggcatatttgcaaaccaaatatttcttaaatattttggtaatatccaaaatataaagaaacacagatgattcaataca<br>aacaataaataaataataggaaaataaaaaattaaaaagaagaaaatctgccttattgagagaattgatgaacctggagagatgtaaaact<br>aagaaaaataagcctgacacaaaaagacaaatactacacaacctgtctcatatgtgaaacataaaaaagtcactctcatggaacagacagtag<br>aggataggtttccaggggttgggggtgggagaatcaggaaac                                                                                                                                                                                                                                                                                                                                                                                                                                                                                                                                                                              |
| Construct 1:<br>miR30shRNA ex-<br>pression cassette<br>with inverted<br>BsmBI sites                                      | <u>atcgata</u> ccgtgtaaatacacttgcaaggaggatgttttagtagcaattgtactgatggatggggccaagagatatatcttagaggaggagg<br>ctgagggtttgaagtccaactcctaagccagtgccagaagagccaaggacagggtacggctgtcatcacttagacctcacctgtggagccacac<br>cctagggttggccaatctactccaggagcaggagggcaggagccagggtgggcataaaaagtcagggcagagccatctattgcttacattt<br>gcttctgacacaactgtgttactagcaacctcaaacagacacc <u>accggtt</u> gtttgaatgaggcttcagtttacagaatcggtgcctgcacatct<br>tggaacacttgctgggattacttctcagggttaacccaacagaaggctaaagaaggatattgctgtgacagtgcgagagacggaagccc<br><u>agacgtctcat</u> gctactgcctcggacttcaaggggctacttttaggagcaattatctgtttactaaaactgaatacctgtcatctcttgatacattt<br>ttcaaaagctgaattaaaatgggtataaattaaatcactttt <u>agcgtc</u> gtcgtcttctgtcttccatttctataaaggttcccttgttccctaaagtcca<br>actactaaactgggggatattatgaaggccttgagcatctggattctgcctaataaaaaacatttattttcattgcaatgatgtatttaaat                                                                                                                                                                                                                                                                                                                                                                                                                                                                                                                                                                                  |
| Construct 2: β <sup>AS3</sup> -<br>globin transgene<br>with AgeI and<br>AfeI restriction<br>sites in IVS2 break<br>point | <u>atcgata</u> ccgtgtaaatacacttgcaaggaggatgttttagtagcaattgtactgatggatggggccaagagatatatcttagaggaggagg<br>ctgagggtttgaagtccaactcctaagccagtgccagaagagccaaggacagggtacggctgtcatcacttagacctcacctgtggagccacac<br>cctagggttggccaatctactccaggagcaggagggcaggagccagggtgggcataaaaagtcagggcagagccatctattgcttacattt<br>gcttctgacacaactgtgttactagcaacctcaaacagacacctgggtgcacctgactcctgaggagaagctgcggttactgcctgtgggac<br>aaggtgaacgtggatgccgttgggtgaggccctgggcagggttggtatcaaggttacaagacagggttaaggagaccaatagaaactgggc<br>atgtggagacagagaagactcttgggttctgataggcactgactctctgcctattgggtctatttccacccttaggtgcctggtggtctaccctt<br>ggaccagaggttctttagtcttggggtatctgtccactcctgatgctgttatgggcaaccctaagggtgaaggctcatggcaagaaagtgtc<br>ggtgccttttagtgatggcctggctcacctggacaacctcaagggcaccttggccagctgagtgcctgactgtgacagctgcacgtggatcc<br>tgagaacttcagggtgagctatgggaccttgatgttttcttcccttcttctatgggttaagttcatgtcataggaaggggagaagtaacaggg<br>ta <u>accggtt</u> ctagggcacc <u>agcgtt</u> tttctcatataaattgtaactgatgtaagagggttcatattgctaatagcagctacaatccagctaccattct<br>gcttttattttatgggtgggataagggtgattattctgagtccaagctaggccctttgctaatacatgttcataacctcttatcttctccacagctcctg<br>ggcaacgtgctgtctgtgtgctggccatcactttggcaagaattcacccaccagtcagggtgcctatcagaaagtggtggctggtgtgg<br>ctaatgcctggcccacaagtatcactaagctcgttcttctgtgtccaatttctataaaggttcccttgttccctaagtcctaactactaaactggggg<br>atattatgaaggcccttgagcatctggattctgcctaataaaaaacatttattttcattgcaatgatgtatttaaat |

<sup>1</sup>Underlined sequences indicate restriction sites used for cloning.

Table S2. Primers and Probes used for PCR-based assays

| Assay                                               | Primer                  | Sequence (5'-3')                                  |
|-----------------------------------------------------|-------------------------|---------------------------------------------------|
| Vector copy number                                  | LV_Fw                   | TCTCGACGCAGGACTCG                                 |
|                                                     | LV_Rv                   | TACTGACGCTCTCGCACC                                |
|                                                     | LV Probe                | Yakima-Yellow-ATCTCTCTCCTTCTAGCCTC- ZNA-4-BHQ-1   |
|                                                     | PCB2_Fw                 | TTGTGTCTCCAGTCTGCTTG                              |
|                                                     | PCB2_Rv                 | AGGTGGTGGTGGTGGTA                                 |
|                                                     | PCB2 Probe              | FAM-CCCTCTCCTGGCTCTAAATGTTGTGT- BHQ-1             |
| Aberrant and normal $\beta$ -globin mRNA expression | hHBB_EX1_Fw             | GGGCAAGGTGAACGTG                                  |
|                                                     | hHBB_EX2_Rv             | GGACAGATCCCCAAAGGAC                               |
|                                                     | IVS1-110 MGB Probe      | VIC-TGGGCAGTCTATTT-MGB-NFQ                        |
| Human $\alpha$ -globin mRNA expression              | wtHBB ZNA Probe         | 6-FAM- TGG G(PDC)A GG(PDC) TG(PDC) TG-ZNA-3-BHQ-1 |
|                                                     | hAlpha_Fw               | GGACCCGGTCAACTTCAA                                |
| Murine $\alpha$ -globin mRNA expression             | hAlpha_Rv               | CGGTATTTGGAGGTCAGCAC                              |
|                                                     | hAlpha_Fw               | GTCACGGCAAGAAGGTCGC                               |
| Human $\beta$ -globin mRNA expression               | hAlpha_Rv               | GGGGTGAAATCGGCAGGGT                               |
|                                                     | hHBB_EX2_Fw             | GGCAAGAAAGTGCTCGG                                 |
| Vector derived $\beta$ AS3-globin mRNA expression   | hHBB_EX2.3_Rv           | GTGCAGCTCACTCAGTG                                 |
|                                                     | LV_ $\beta$ AS3_G16D_Fw | AAGGTGAACGTGGATGCCG                               |
|                                                     | LV_ $\beta$ AS3_Rv      | GCACTTTCTTGCCATGAGCC                              |
| Vector derived miR30 mRNA expression                | LV_miR30_Fw             | AATCGTTGCCTGCACATCTTG                             |
|                                                     | LV_miR30_Rv             | CCTTCTTTAGCCTTCTGTTGGG                            |
| Vector derived eGFP mRNA expression                 | eGFP_Fw                 | GGCAAGCTGACCCTGAAGTT                              |
|                                                     | eGFP_Rv                 | AGATGGTGCGCTCCTGGA                                |
| $\beta$ AS3-globin mRNA splicing                    | LV_ $\beta$ AS3_T87Q_Fw | CAAGGGCACCTTTGCCCAG                               |
|                                                     | LV_ $\beta$ AS3_EX3_Rv  | GGTGGGGTGAATTCTTTGCC                              |

Disclaimer/Publisher's Note: The statements, opinions and data contained in all publications are solely those of the individual author(s) and contributor(s) and not of MDPI and/or the editor(s). MDPI and/or the editor(s) disclaim responsibility for any injury to people or property resulting from any ideas, methods, instructions or products referred to in the content.
